# Supplementary material for: HIF-1α induces the epithelial-mesenchymal transition in gastric cancer stem cells through the Snail pathway
Source: PubMed Central journal article supplement (PMC5354751; doi:10.18632/oncotarget.14484), 2017-01-04
Supplement: oncotarget-08-9535-s001.pdf [file oncotarget-08-9535-s001.pdf]

## HIF-1 $\alpha$ induces the epithelial-mesenchymal transition in gastric cancer stem cells through the Snail pathway

### Supplementary Materials

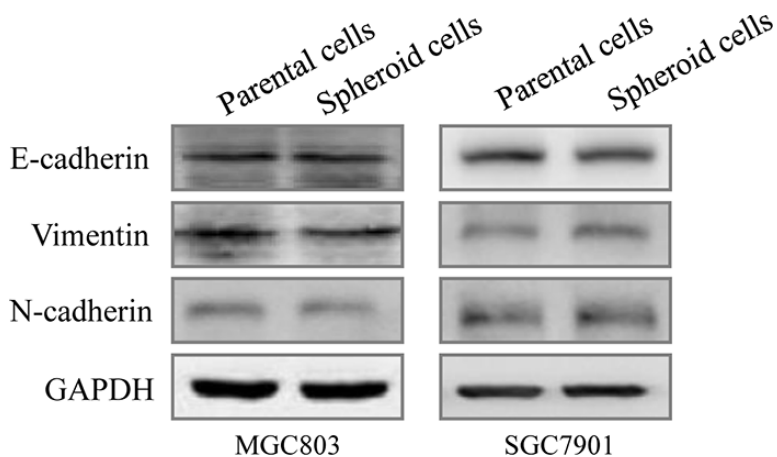

Supplementary Figure S1: The EMT-related proteins in MGC803 and SGC7901 spheroid cells compared with parental cells.

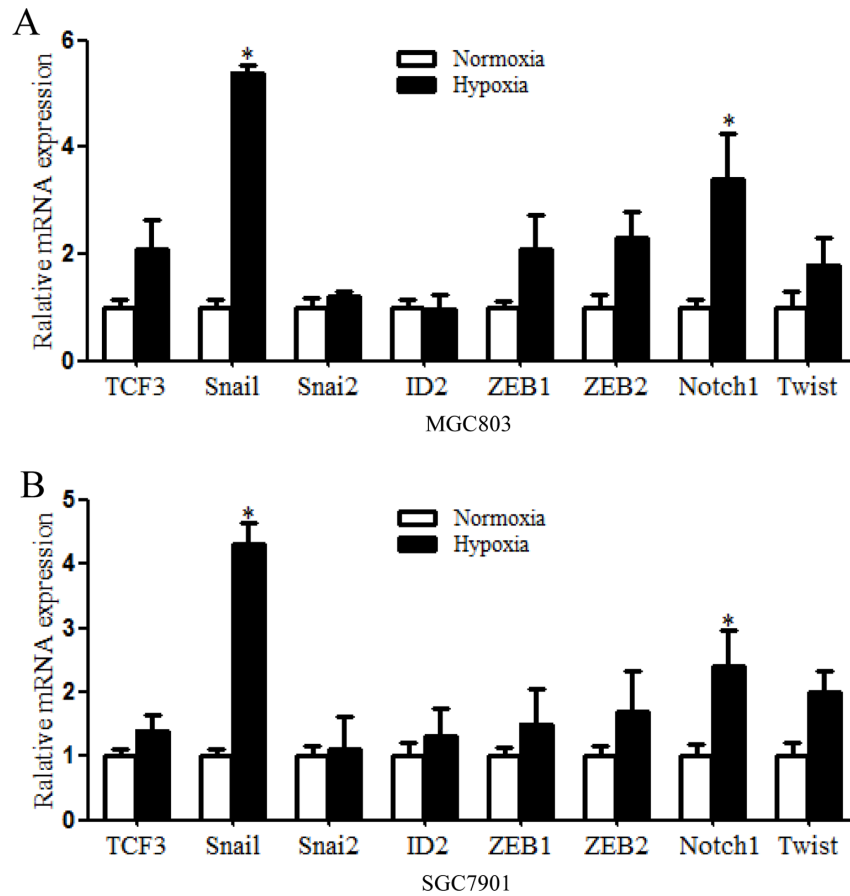

**Supplementary Figure S2: Levels of the Snail gene are significantly increased in MGC803 and SGC7901 spheroid cells under hypoxia induction.** (A) qRT-PCR analysis of Snail, TCF3, ZEB1, ZEB2, ID2, SNAI2, NOTCH1 and TWIST gene expression in MGC803 spheroid cells under hypoxia induction compared with normoxia-treated cells. (B) qRT-PCR analysis of Snail, TCF3, ZEB1, ZEB2, ID2, SNAI2, NOTCH1 and TWIST gene expression in SGC7901 spheroid cells under hypoxia induction compared with normoxia-treated cells.

**Supplementary Table S1: Sequences of primers used for qRT-PCR in this study**

| Gene              | Forward                         | Reverse                         |
|-------------------|---------------------------------|---------------------------------|
| <i>HIF-1a</i>     | 5'- GTCGGACAGCCTCACAAACAGAGC-3' | 5'- GTTAACTTGATCCAAAGCTCTGAG-3' |
| <i>E-cadherin</i> | 5'- GGAGGCCTTGGGATACTTTGAA-3'   | 5'- GAGCTATAGAGGCCTGGGGATTAC-3' |
| <i>Vimentin</i>   | 5'- CCAGGCAAAGCAGGAGTC-3'       | 5'- GGGTATCAACCAGAGGGAGT-3'     |
| <i>NANOG</i>      | 5'- TGAACCTCAGCTACAAACAG-3'     | 5'- TGGTGGTAGGAAGAGTAAAG-3'     |
| <i>OCT-4</i>      | 5'- AGCGAACCAGTATCGAGAAC-3'     | 5'- TTACAGAACCACACTCGGAC-3'     |
| <i>Snail</i>      | 5'- CCTCCCTGTCAGATGAGGAC-3'     | 5'- CCAGGCTGAGGTATTCCCTTG-3'    |
| <i>GAPDH</i>      | 5'- GGCATCCTGGGCTACACT-3'       | 5'- CCACCACCCTGTTGCTGT-3'       |
| <i>TCF3</i>       | 5'- CCCAGGAGCCTGAGCTG-3'        | 5'- CTGTCACCAACGGGAAGG-3'       |
| <i>ID2</i>        | 5'- TCAGCACTTAAAAGATTCCGTG-3'   | 5'- GACAGCAAAGCACTGTGTGG-3'     |
| <i>SNAI2</i>      | 5'- TGACCTGTCTGCAAATGCTC-3'     | 5'- CAGACCCTGGTTGCTTCAA-3'      |
| <i>NOTCH1</i>     | 5'- GTTGGGGTCTCTGGCATC-3'       | 5'- GGTGAGACCTGCCTGAATG-3'      |
| <i>TWIST</i>      | 5'- TCCATTTTCTCCTTCTCTGGAA-3'   | 5'- GTCCGCGTCCCCTAGC-3'         |
| <i>ZEB1</i>       | 5'- TGCAGTTTGTCTTCATCATCTG-3'   | 5'- CCAGGTGTAAGCGCAGAAA-3'      |
| <i>ZEB2</i>       | 5'- TCCCAATTCTGGAGTAAAGTCTC-3'  | 5'- GCCACAAATGAAAGTCCTGG-3'     |

**Supplementary Table S2: Sequences of shRNA target to snail in this study**

| shRNAs                         | shRNA sequence                                                   |
|--------------------------------|------------------------------------------------------------------|
| <i>shRNA I Forward oligo</i>   | 5'-CCGGGCAACAAGGAATACCTCAGCCCTCGAGGGCTGAGGTATTCCTTGTTGCTTTTTG-3' |
| <i>shRNA I Reverse oligo</i>   | 5'-AATTCAAAAAGCAACAAGGAATACCTCAGCCCTCGAGGGCTGAGGTATTCCTTGTTGC-3' |
| <i>shRNA II Forward oligo</i>  | 5'-CCGGCCCACTCAGATGTCAAGAACTCGAGTTCTTGACATCTGAGTGGGTTTTG-3'      |
| <i>shRNA II Reverse oligo</i>  | 5'-AATTCAAAAACCCACTCAGATGTCAAGAACTCGAGTTCTTGACATCTGAGTGGG-3'     |
| <i>shRNA III Forward oligo</i> | 5'-CCGGGCTCTTTCCTCGTCAGGAACTCGAGTTCCTGACGAGGAAAGAGCTTTTTG-3'     |
| <i>shRNA III Reverse oligo</i> | 5'-AATTCAAAAAGCTCTTTCCTCGTCAGGAACTCGAGTTCCTGACGAGGAAAGAGC-3'     |
